# Supplementary material
Source: PubMed Central journal article supplement (PMC4187920)
Supplement: AAC.03466-14_zac010143317so1.pdf [file AAC.03466-14_zac010143317so1.pdf]

**SUPPLEMENTAL MATERIAL**

**Hepatitis C virus NS3 sequence diversity and antiviral resistance-associated variant frequency in HCV/HIV coinfection**

**Table S1.** Primer ID primers for cDNA synthesis.

| <b>Unique Sequence</b>     | <b>Primer ID</b> | <b>Bar-code</b> | <b>HCV-complementary Sequence</b> |
|----------------------------|------------------|-----------------|-----------------------------------|
| ACCTGGCAAGCACGCTCTGGCCTTGA | NNNNNNNN         | CTNNNN          | GAACACCGGGGACCTCATGGTTGTCTC       |
| .....                      | NNNNNNNN         | NNNN            | .....T.....                       |
| .....                      | NNNNNNNN         | NNNN            | .....T.G.....                     |
| .....                      | NNNNNNNN         | NNNN            | A.....                            |
| .....                      | NNNNNNNN         | NNNN            | .....A.....                       |
| .....                      | NNNNNNNN         | NNNN            | .....T.....                       |
| .....                      | NNNNNNNN         | NNNN            | .....A.....                       |
| .....                      | NNNNNNNN         | NNNN            | .....A.....                       |
| .....                      | NNNNNNNN         | NNNN            | .....T.....                       |

**Table S2.** Most frequent primer ID sequences in two independent sequencing runs.

| Subject | Run 1     |       | Run 2     |       |
|---------|-----------|-------|-----------|-------|
|         | Primer ID | Count | Primer ID | Count |
| M1      | CACCGTAT  | 58    | TATCCGGC  | 22    |
|         | TTCGTCGA  | 40    | CTACGACT  | 22    |
|         | CCCGCCCC  | 39    | ACCGAACA  | 22    |
|         | CGATTGCC  | 38    | CCCGCCCC  | 20    |
|         | ACGTGTTC  | 38    | CCCATATA  | 20    |
|         | ATCACATA  | 37    | GAGATTCA  | 18    |
|         | ACCAGTAC  | 36    | GCGCCGCG  | 17    |
|         | CCGCCACC  | 35    | CACCCCGC  | 17    |
| M2      | AACATCCC  | 37    | CGGGTGAA  | 26    |
|         | ATGTGCTA  | 36    | AATGCAAT  | 26    |
|         | AGATGATA  | 35    | TGGCGAAA  | 22    |
|         | TTAACATA  | 33    | GTCGATAT  | 22    |
|         | ACATGCTA  | 33    | ATAACTAT  | 22    |
|         | CATACTCA  | 32    | GTGAGCAC  | 21    |
|         | AACATGAC  | 32    | ACATAGAA  | 21    |
| C1      | CCCCGCCC  | 19    | CCCGCCCC  | 27    |
|         | CTCCCCAC  | 17    | CCCCTCCC  | 22    |
|         | CCGCCAC   | 16    | CCCCCGCC  | 21    |
|         | CCCCTCCC* | 16    | CCCCCACC  | 20    |
|         | CCCCCGCC  | 16    | CCCTCCCC  | 19    |
|         | CCCTCCCC  | 15    | CCCCACCC  | 18    |
| C2      | CCTAGTCT  | 77    | AATAACAA  | 71    |
|         | AATACCAA  | 63    | GCCGCGAG  | 60    |
|         | GACACAGG  | 58    | TATTGTTA  | 55    |
|         | GTTGAATC  | 54    | ACCAATAT  | 54    |
|         | CCTACATG  | 54    | TAGCGTAC  | 52    |
|         | TTCATTAA  | 53    | ATCGGAGG  | 52    |
|         | ATTCAAGA  | 53    | ATTGATAA  | 51    |

\*Primer ID sequences common to both runs are color-coded.

**Table S3.** Multivariable Linear Regression Models for Pairwise Nucleotide Diversity ( $\pi$ ).

| N               | Variable                                         | $\beta$ estimate | S.E. <sup>a</sup> | p-value |
|-----------------|--------------------------------------------------|------------------|-------------------|---------|
| 40              | HIV co-infection                                 | -0.00471         | 0.00191           | 0.02    |
|                 | Sequencing depth ( $\log_{10}$ )                 | -0.00340         | 0.00283           | 0.24    |
|                 | Serum/plasma HCV RNA<br>( $\log_{10}$ copies/mL) | 0.00269          | 0.00145           | 0.07    |
| N               | Variable                                         | $\beta$ estimate | S.E.              | p-value |
| 38*             | African-American race                            | -0.00319         | 0.00202           | 0.12    |
|                 | Sequencing depth ( $\log_{10}$ )                 | -0.00473         | 0.00301           | 0.12    |
|                 | Serum/plasma HCV RNA<br>( $\log_{10}$ copies/mL) | 0.00234          | 0.00156           | 0.14    |
| N               | Variable                                         | $\beta$ estimate | S.E.              | p-value |
| 38 <sup>b</sup> | HIV co-infection                                 | -0.00382         | 0.00229           | 0.11    |
|                 | African-American race                            | -0.00145         | 0.00223           | 0.52    |
|                 | Sequencing depth ( $\log_{10}$ )                 | -0.00365         | 0.00300           | 0.23    |
|                 | Serum/plasma HCV RNA<br>( $\log_{10}$ copies/mL) | 0.00270          | 0.00153           | 0.09    |

<sup>a</sup>S.E. = standard error.

<sup>b</sup>Excludes subjects with race = Other.

**Table S4.** Multivariable Linear Regression Models for Tajima's *D*.

| N               | Variable                                              | $\beta$ estimate | S.E. <sup>a</sup> | p-value |
|-----------------|-------------------------------------------------------|------------------|-------------------|---------|
| 40              | HIV co-infection                                      | -0.11445         | 0.06787           | 0.10    |
|                 | Sequencing depth (log <sub>10</sub> )                 | -0.07328         | 0.10063           | 0.47    |
|                 | Serum/plasma HCV RNA<br>(log <sub>10</sub> copies/mL) | 0.04852          | 0.05150           | 0.35    |
| N               | Variable                                              | $\beta$ estimate | S.E.              | p-value |
| 38 <sup>b</sup> | African-American race                                 | -0.12238         | 0.06929           | 0.09    |
|                 | Sequencing depth (log <sub>10</sub> )                 | -0.09367         | 0.10299           | 0.37    |
|                 | Serum/plasma HCV RNA<br>(log <sub>10</sub> copies/mL) | 0.03580          | 0.05332           | 0.51    |

<sup>a</sup>S.E. = standard error.

<sup>b</sup>Excludes subjects with race = Other.

**Table S5.** Multivariable Linear Regression Model for Shannon Index.

| N               | Variable              | $\beta$ estimate | S.E.    | p-value |
|-----------------|-----------------------|------------------|---------|---------|
| 38 <sup>b</sup> | African-American race | -0.83755         | 0.37390 | 0.03    |
|                 | HIV co-infection      | -0.23619         | 0.37390 | 0.53    |

<sup>a</sup>S.E. = standard error.

<sup>b</sup>Excludes subjects with race = Other.

Figure S1

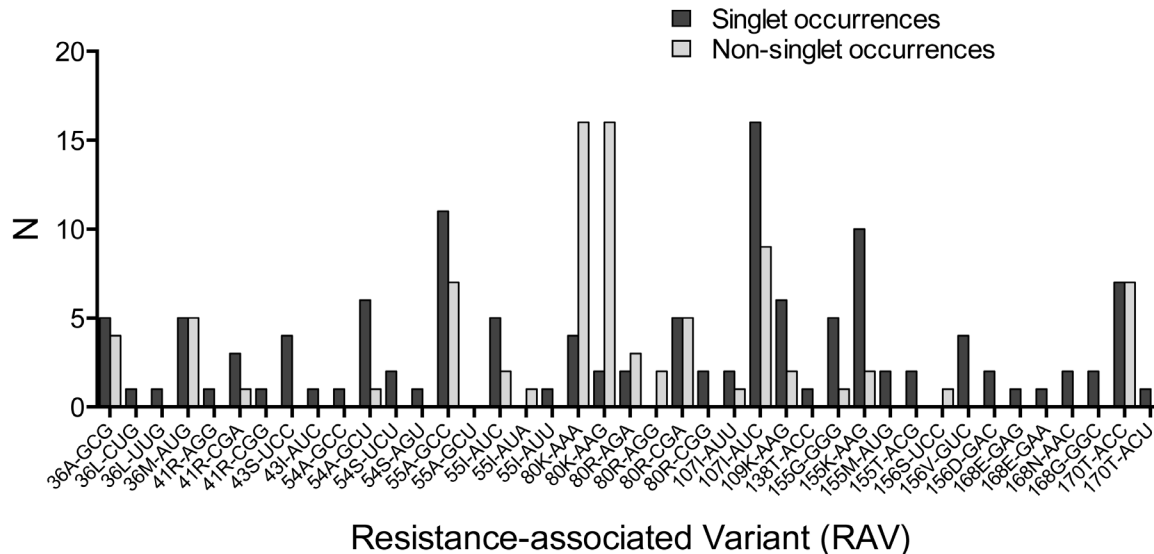

**Figure S1.** Number of subjects with singlet and non-singlet occurrences of individual RAVs. There was substantial association between singlet and non-singlet occurrences of specific RAVs, excluding Q80K (Spearman's  $\rho = 0.606$ , Monte-Carlo permutation\*  $p < 0.001$ ).

\*<http://www2.sas.com/proceedings/sugi27/p251-27.pdf>
